# Supplementary material for: Slot-Die-Coated Active Layer for Printed Flexible Back-Contact Perovskite Solar Cells
Source: MDPI journal article supplement (doi:10.3390/coatings13030550), 2023-03-03
Supplement: s1 [file coatings-2203293-supplementary.pdf › coatings-2203293-supplementary.pdf]

Article

# Supplementary Materials: Slot-Die-Coated Active Layer for Printed Flexible Back-Contact Perovskite Solar Cells

Hryhorii P. Parkhomenko, Mayuribala Mangrulkar and Askhat N. Jumabekov \*

Department of Physics, School of Sciences and Humanities, Nazarbayev University, Astana 010000, Kazakhstan

\* Correspondence: askhat.jumabekov@nu.edu.kz

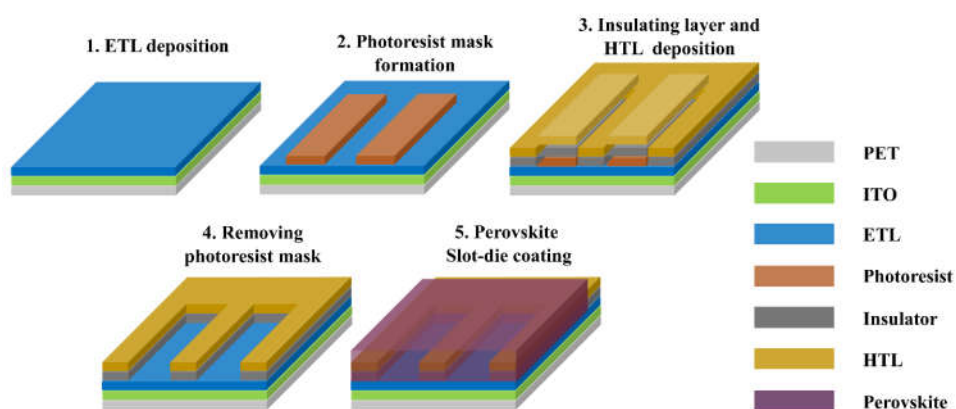

**Figure S1.** Block diagram illustrating the process of PFQIBC PSC fabrication and a schematic diagram of the final device.

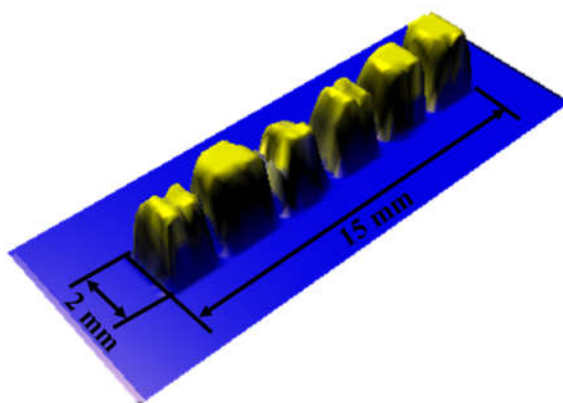

**Figure S2.** Photocurrent map of PFQIBC PSCs. The data was taken with a laser of 410 nm wavelength.

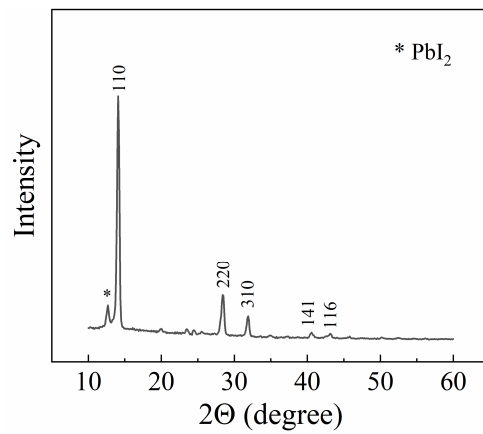

**Figure S3.** XRD pattern of a slot-die coated perovskite film on PET substrate.

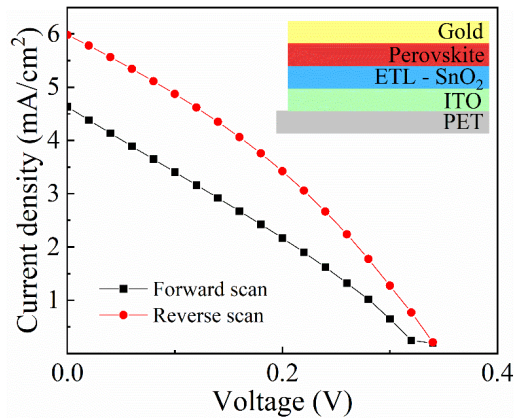

**Figure S4.** Current-voltage characteristic curves of a printed and flexible perovskite solar cell with a sandwich structure. The inset graph shows a scheme of the device structure.

**Table S1.** The photovoltaic parameters of a sandwich PSC under AM1.5G solar irradiation.

| Scan direction | $V_{oc}$ , V | $J_{sc}$ , mA/cm <sup>2</sup> | $FF$ , % | $PCE$ , % |
|----------------|--------------|-------------------------------|----------|-----------|
| Reverse        | 0.34         | 6.02                          | 32       | 0.67      |
| Forward        | 0.33         | 4.62                          | 28       | 0.43      |

**Disclaimer/Publisher's Note:** The statements, opinions and data contained in all publications are solely those of the individual author(s) and contributor(s) and not of MDPI and/or the editor(s). MDPI and/or the editor(s) disclaim responsibility for any injury to people or property resulting from any ideas, methods, instructions or products referred to in the content.
